# Supplementary material
Source: Springer Nature journal article supplement (https://www.springermedizin.de/resource/supplementary/13054_2013_3009_MOESM2_ESM.pdf/9712386)
Supplement: MOESM2 [file 9712386]

Absence of signs of circulation and/or considered for resuscitation

**Resuscitation not attempted**

Resuscitation attempted

Initial monitored rhythm

Shockable rhythm

**Unshockable rhythm**

Witnessed arrest by bystanders

**Unwitnessed arrest by bystanders**

Prehospital ROSC

**No prehospital ROSC**

Consider an advanced life support

**Consider a termination of resuscitation**
